# Supplementary material for: The Characterisation of Lactococcus garvieae Isolated in an Outbreak of Septicaemic Disease in Farmed Sea Bass (Dicentrarchus labrax, Linnaues 1758) in Italy
Source: MDPI journal article supplement (doi:10.3390/pathogens13010049), 2024-01-04
Supplement: s1 [file s1]

**Table S1** – Salogni et. al – The Characterization of *Lactococcus garvieae* isolated in an Outbreak of Septicaemic Disease in Farmed Sea Bass (*Dicentrarchus labrax*, Linnaeus 1758) in Italy

**Table S1.** Method used for the partial sequencing of 16S ribosomal DNA (rDNA) on strain LI296620A\_23 using MicroSEQ 500 16S rDNA Bacterial Identification System (Thermo Fisher Scientific).

| Step | Actions and conditions                                                                                                                                                                                                                  |
|------|-----------------------------------------------------------------------------------------------------------------------------------------------------------------------------------------------------------------------------------------|
| 1    | The bacterial suspension was inactivated in PrepMan Ultra Sample Preparation Reagent (Life Technologies) by boiling at 100 °C for 10 min.                                                                                               |
| 2    | A 500-bp 16S rDNA fragment was amplified from the 5' end of the gene in a reaction volume of 30 µl (15 µl of MicroSEQ PCR master mix and 15 µl of bacterial extract) using a MicroSEQ 500 rDNA fast PCR kit (Thermo Fisher Scientific). |
| 3    | <i>The PCR conditions were as follows:</i> 10 sec of initial denaturation at 95 °C, followed by 30 cycles of 0 sec at 95 °C, 15 sec at 64 °C and 1 min at 72 °C.                                                                        |
| 4    | The amplicon was purified using Exonuclease I and FastAP (Thermo Fisher Scientific).                                                                                                                                                    |
| 5    | Forward and reverse sequencing reactions were performed on the amplified product using a MicroSEQ 500 rDNA sequencing kit (Thermo Fisher Scientific) following the manufacturer's instructions.                                         |
| 5    | The sequencing reactions consisted of 13 µl of MicroSEQ sequencing mix and 7 µl of purified amplified product.                                                                                                                          |
| 7    | The thermal cycling conditions were as follows: 1.30 min at 96 °C, 25 cycles of annealing of 10 sec at 96 °C, 5 sec at 55 °C and 4 min at 60 °C.                                                                                        |
| 8    | Sequencing reactions were purified with the BigDye XTerminator Purification Kit (Thermo Fisher Scientific) according to the manufacturer's instructions.                                                                                |
| 9    | The sequence reactions were separated by capillary electrophoresis onto a SeqStudio Genetic Analyzer (Thermo Fisher Scientific) according to the standard automated sequencer protocols.                                                |
