# Supplementary material for: The Characterisation of Lactococcus garvieae Isolated in an Outbreak of Septicaemic Disease in Farmed Sea Bass (Dicentrarchus labrax, Linnaues 1758) in Italy
Source: MDPI journal article supplement (doi:10.3390/pathogens13010049), 2024-01-04
Supplement: s1 [file s1]

**Figure S1** – Salogni et. al – The Characterization of *Lactococcus garvieae* isolated in an Outbreak of Septicaemic Disease in Farmed Sea Bass (*Dicentrarchus labrax*, Linnaeus 1758) in Italy

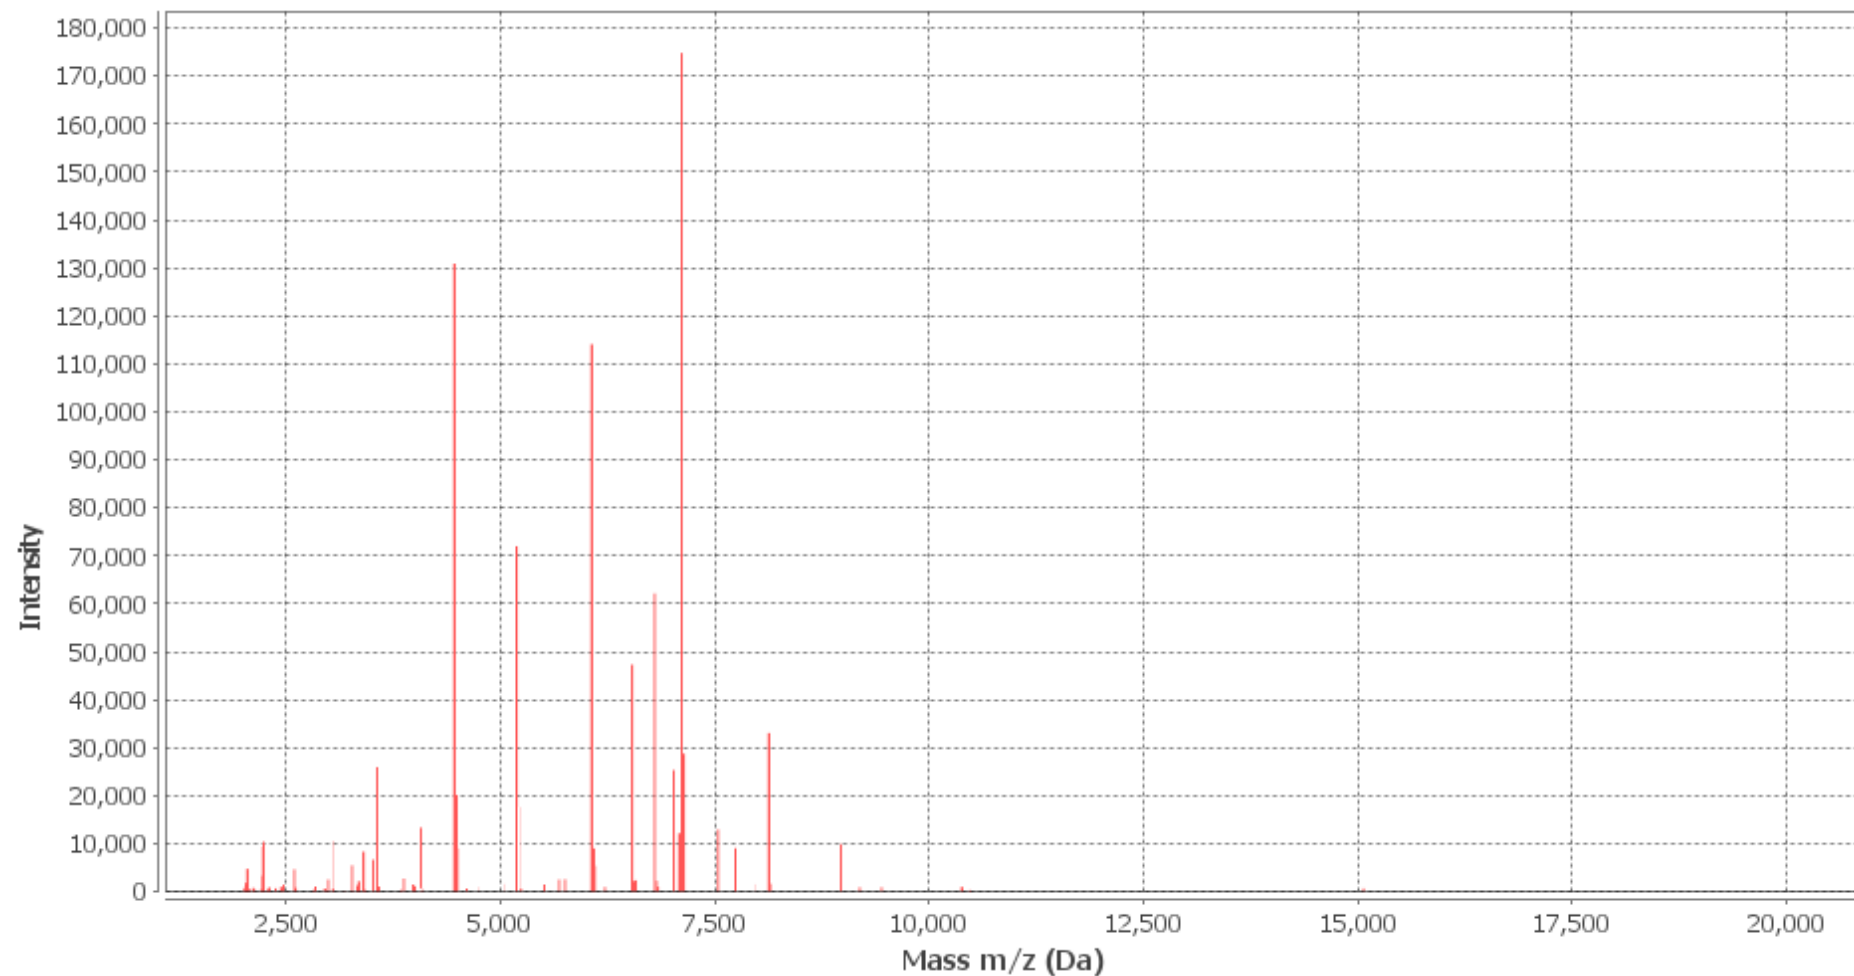

**Figure S1.** Main spectrum profiles of the *Lactococcus garvieae* isolated during an outbreak in sea bass (*Dicentrarchus labrax*) reared in an inland intensive farm located in the Gulf of Follonica (Tuscany, Italy). Intensity (Y-axis) is shown as a function of the mass-to-charge ratio (m/z, molecular weight for a single positive charge; X-axis).
