# Supplementary material for: The Characterisation of Lactococcus garvieae Isolated in an Outbreak of Septicaemic Disease in Farmed Sea Bass (Dicentrarchus labrax, Linnaues 1758) in Italy
Source: Pathogens. 2024 Jan 4;13(1):49. doi: 10.3390/pathogens13010049 (PMC10820654; doi:10.3390/pathogens13010049)
Supplement: Supplementary file 1 [file pathogens-13-00049-s001.zip › Supplementary_Table_S2_SNP_Matrix.xlsx]

## Sheet: Supplementary Table 1
Table S1 - Salogni et. al - The Characterization of Lactococcus garvieae isolated in an Outbreak of Septicaemic Disease in Farmed Sea Bass (Dicentrarchus labrax, Linnaues 1758) in Italy - SNP Matrix. Lactococcus garvieae strains isolated from sea bass (Dicentrarchus labrax) described in the case report are highlighted in bold red	BS000031_98_rainbow_trout/1-2945	Lactococcus_cremoris_NC_022369.1_strain_KW2/1-2945	Lactococcus_lactis_NZ_CP059048.1_strain_LAC460/1-2945	Lactococcus_petaur_NZ_CP094882.1_strain_B1726/1-2945	Lgarviae_GCF_000212475.1_LacGar1.0/1-2945	Lgarviae_GCF_000236535.2_strain_Lg9/1-2945	Lgarviae_GCF_000269705.1_ASM26970v1_strain_IPLA31405/1-2945	Lgarviae_GCF_000300795/1-2945	Lgarviae_GCF_000305995.1_strain_Tac2_/1-2945	Lgarviae_GCF_000739975.1_ASM73997v1_strain_NBRC_100934/1-2945	Lgarviae_GCF_002077975/1-2945	Lgarviae_GCF_006782925.1_ASM678292v1_strain_RTCLI04/1-2945	Lgarviae_GCF_008692985.1_ASM869298v1_strain_CCUG32208T/1-2945	Lgarviae_GCF_011365045.1_ASM1136504v1_strain_TILSE2/1-2945	Lgarviae_GCF_011365245.1_ASM1136524v1_strain_TILSE6/1-2945	Lgarviae_GCF_013374035.1_ASM1337403v1_strain_lg38/1-2945	Lgarviae_GCF_018348525.1_ASM1834852v1_strain_INF126/1-2945	Lgarviae_GCF_022698225.1_ASM2269822v1_strain_OS-37/1-2945	Lgarviae_GCF_024125485.1_ASM2412548v1_strain_B974/1-2945	Lgarviae_GCF_027658615.1_ASM2765861v1_strain_AM109-103/1-2945	Lgarviae_GCF_027672185.1_ASM2767218v1_strain_AM17-43/1-2945	Lgarviae_GCF_027677925/1-2945	Lgarviae_GCF_027678125/1-2945	Lgarviae_GCF_027678525.1_ASM2767852v1_strain_TM115_237/1-2945	Lgarviae_GCF_029339845.1_ASM2933984v1_strain_1683/1-2945	Lgarviae_GCF_029339875.1_ASM2933987v1_strain_1691_1/1-2945	Lgarviae_GCF_029339895.1_ASM2933989v1_strain_1181/1-2945	Lgarviae_GCF_029761755.1_ASM2976175v1_strain_ATCC43921/1-2945	Lgarviae_GCF_029911905.1_ASM2991190v1_strain_ZB-1/1-2945	Lgarviae_GCF_030210915.1_ASM3021091v1_strain_G-34/1-2945	Lgarviae_GCF_030210975.1_ASM3021097v1_strain_N201/1-2945	Lgarviae_GCF_030211055.1_ASM3021105v1_strain_G24/1-2945	Lgarviae_GCF_030211125.1_ASM3021112v1_strain_CAS_2/1-2945	Lgarviae_GCF_030211265.1_ASM3021126v1_strain_93/1-2945	Lgarviae_GCF_030211295.1_ASM3021129v1_strain_240_88/1-2945	Lgarviae_GCF_030211355.1_ASM3021135v1_strain_1108_2/1-2945	Lgarviae_GCF_030211455.1_ASM3021145v1_strain_170_03a/1-2945	Lgarviae_GCF_030211565.1_ASM3021156v1_strain_DICM09_00973-1/1-2945	Lgarviae_GCF_030211605.1_ASM3021160v1_strain_BA06_02552-1/1-2945	Lgarviae_GCF_030211615.1_ASM3021161v1_strain_BA06_02137_2/1-2945	Lgarviae_GCF_030219645.1_ASM3021964v1_strain_T1-1/1-2945	Lgarviae_GCF_030219685.1_ASM3021968v1_strain_MAM75/1-2945	Lgarviae_GCF_030219725.1_ASM3021972v1_strain_3AA7/1-2945	Lgarviae_GCF_031929565/1-2945	Lgarviae_GCF_900114555.1_strain_M79/1-2945	Lgarviae_NC_015930.1_strain_ATCC_49156/1-2945	Lgarviae_NC_017490.1_strain_Lg2/1-2945	Lgarviae_NZ_AP026069.1_strain_MS210922A/1-2945	Lgarviae_NZ_CP026502.1_strain_JJJN1/1-2945
BS000031_98_rainbow_trout/1-2945	0	665	664	808	2	3	112	905	116	250	896	228	250	241	241	220	181	255	42	248	237	267	269	113	1	1	237	250	194	237	183	237	113	114	39	37	40	244	247	32	112	218	182	406	211	275	270	194	271
Lactococcus_cremoris_NC_022369.1_strain_KW2/1-2945	665	0	317	1119	665	664	699	1109	700	676	1106	672	676	660	660	666	733	699	661	691	656	686	688	697	664	664	692	676	480	658	735	692	700	694	662	660	663	684	679	657	699	673	734	826	673	691	686	480	687
Lactococcus_lactis_NZ_CP059048.1_strain_LAC460/1-2945	664	317	0	1134	664	663	700	1112	705	677	1107	675	677	660	660	665	739	695	661	695	656	687	689	702	663	663	686	677	477	658	741	686	701	699	662	660	663	683	682	656	700	676	740	829	674	693	688	477	689
Lactococcus_petaur_NZ_CP094882.1_strain_B1726/1-2945	808	1119	1134	0	808	809	735	1266	757	833	1259	815	833	804	804	808	698	839	791	811	800	822	824	754	807	807	831	833	717	802	700	831	736	751	792	790	793	827	836	799	735	816	699	909	818	828	823	717	824
Lgarviae_GCF_000212475.1_LacGar1.0/1-2945	2	665	664	808	0	3	112	905	116	250	896	228	250	241	241	220	181	255	42	248	237	267	269	113	1	1	237	250	194	237	183	237	113	114	39	37	40	244	247	32	112	218	182	406	211	275	270	194	271
Lgarviae_GCF_000236535.2_strain_Lg9/1-2945	3	664	663	809	3	0	113	904	117	251	895	229	251	242	242	221	182	256	43	249	238	268	270	114	2	2	238	251	193	238	184	238	114	115	40	38	41	245	248	33	113	219	183	407	212	276	271	193	272
Lgarviae_GCF_000269705.1_ASM26970v1_strain_IPLA31405/1-2945	112	699	700	735	112	113	0	932	154	298	923	272	298	286	286	266	73	299	78	294	282	313	315	151	111	111	285	298	232	284	75	285	1	152	81	79	82	284	289	106	0	264	74	445	257	321	316	232	317
Lgarviae_GCF_000300795/1-2945	905	1109	1112	1266	905	904	932	0	944	918	114	912	918	904	904	908	968	932	903	927	902	923	925	941	904	904	929	918	752	905	970	929	933	938	902	900	903	930	925	897	932	920	969	1053	920	924	919	752	920
Lgarviae_GCF_000305995.1_strain_Tac2_/1-2945	116	700	705	757	116	117	154	944	0	306	935	284	306	295	295	278	81	311	82	302	291	323	325	9	115	115	295	306	240	291	83	295	155	10	85	83	86	306	301	108	154	278	82	450	271	329	324	240	325
Lgarviae_GCF_000739975.1_ASM73997v1_strain_NBRC_100934/1-2945	250	676	677	833	250	251	298	918	306	0	912	240	0	226	226	177	349	234	250	243	222	252	254	303	249	249	245	0	209	222	351	245	299	302	249	247	250	217	113	244	298	226	350	403	223	258	253	209	254
Lgarviae_GCF_002077975/1-2945	896	1106	1107	1259	896	895	923	114	935	912	0	904	912	896	896	903	959	928	894	922	894	916	918	932	895	895	923	912	745	896	961	923	924	929	893	891	894	921	919	888	923	912	960	1046	912	919	914	745	915
Lgarviae_GCF_006782925.1_ASM678292v1_strain_RTCLI04/1-2945	228	672	675	815	228	229	272	912	284	240	904	0	240	228	228	216	325	243	226	266	224	255	257	281	227	227	229	240	204	230	327	229	273	282	227	225	228	246	247	220	272	55	326	401	66	260	255	204	256
Lgarviae_GCF_008692985.1_ASM869298v1_strain_CCUG32208T/1-2945	250	676	677	833	250	251	298	918	306	0	912	240	0	226	226	177	349	234	250	243	222	252	254	303	249	249	245	0	209	222	351	245	299	302	249	247	250	217	113	244	298	226	350	403	223	258	253	209	254
Lgarviae_GCF_011365045.1_ASM1136504v1_strain_TILSE2/1-2945	241	660	660	804	241	242	286	904	295	226	896	228	226	0	0	222	333	235	243	245	4	238	240	292	240	240	231	226	190	14	335	231	287	293	242	240	243	229	222	235	286	216	334	375	213	244	239	190	240
Lgarviae_GCF_011365245.1_ASM1136524v1_strain_TILSE6/1-2945	241	660	660	804	241	242	286	904	295	226	896	228	226	0	0	222	333	235	243	245	4	238	240	292	240	240	231	226	190	14	335	231	287	293	242	240	243	229	222	235	286	216	334	375	213	244	239	190	240
Lgarviae_GCF_013374035.1_ASM1337403v1_strain_lg38/1-2945	220	666	665	808	220	221	266	908	278	177	903	216	177	222	222	0	319	234	220	234	218	231	233	275	219	219	226	177	199	218	321	226	267	276	219	217	220	214	246	214	266	200	320	391	194	237	232	199	233
Lgarviae_GCF_018348525.1_ASM1834852v1_strain_INF126/1-2945	181	733	739	698	181	182	73	968	81	349	959	325	349	333	333	319	0	350	149	347	329	364	366	78	180	180	338	349	275	329	2	338	74	79	152	150	153	341	342	173	73	319	1	482	312	370	365	275	366
Lgarviae_GCF_022698225.1_ASM2269822v1_strain_OS-37/1-2945	255	699	695	839	255	256	299	932	311	234	928	243	234	235	235	234	350	0	255	263	231	272	272	308	254	254	257	234	228	237	352	257	300	309	254	252	255	245	239	251	299	234	351	404	225	278	273	228	274
Lgarviae_GCF_024125485.1_ASM2412548v1_strain_B974/1-2945	42	661	661	791	42	43	78	903	82	250	894	226	250	243	243	220	149	255	0	244	239	267	269	79	41	41	237	250	192	241	151	237	79	80	9	7	10	244	243	36	78	218	150	408	211	275	270	192	271
Lgarviae_GCF_027658615.1_ASM2765861v1_strain_AM109-103/1-2945	248	691	695	811	248	249	294	927	302	243	922	266	243	245	245	234	347	263	244	0	241	265	267	299	247	247	260	243	226	245	349	260	295	300	247	245	248	242	253	242	294	253	348	409	245	267	262	226	263
Lgarviae_GCF_027672185.1_ASM2767218v1_strain_AM17-43/1-2945	237	656	656	800	237	238	282	902	291	222	894	224	222	4	4	218	329	231	239	241	0	234	236	288	236	236	227	222	186	10	331	227	283	289	238	236	239	225	218	231	282	212	330	371	209	240	235	186	236
Lgarviae_GCF_027677925/1-2945	267	686	687	822	267	268	313	923	323	252	916	255	252	238	238	231	364	272	267	265	234	0	2	320	266	266	239	252	214	238	366	239	314	319	266	264	267	247	251	261	313	248	365	406	253	54	47	214	48
Lgarviae_GCF_027678125/1-2945	269	688	689	824	269	270	315	925	325	254	918	257	254	240	240	233	366	272	269	267	236	2	0	322	268	268	241	254	216	240	368	241	316	321	268	266	269	249	253	263	315	250	367	408	255	56	49	216	50
Lgarviae_GCF_027678525.1_ASM2767852v1_strain_TM115_237/1-2945	113	697	702	754	113	114	151	941	9	303	932	281	303	292	292	275	78	308	79	299	288	320	322	0	112	112	292	303	237	288	80	292	152	7	82	80	83	303	298	105	151	275	79	447	268	326	321	237	322
Lgarviae_GCF_029339845.1_ASM2933984v1_strain_1683/1-2945	1	664	663	807	1	2	111	904	115	249	895	227	249	240	240	219	180	254	41	247	236	266	268	112	0	0	236	249	193	236	182	236	112	113	38	36	39	243	246	31	111	217	181	405	210	274	269	193	270
Lgarviae_GCF_029339875.1_ASM2933987v1_strain_1691_1/1-2945	1	664	663	807	1	2	111	904	115	249	895	227	249	240	240	219	180	254	41	247	236	266	268	112	0	0	236	249	193	236	182	236	112	113	38	36	39	243	246	31	111	217	181	405	210	274	269	193	270
Lgarviae_GCF_029339895.1_ASM2933989v1_strain_1181/1-2945	237	692	686	831	237	238	285	929	295	245	923	229	245	231	231	226	338	257	237	260	227	239	241	292	236	236	0	245	219	229	340	0	286	291	236	234	237	242	247	231	285	224	339	400	217	249	244	219	245
Lgarviae_GCF_029761755.1_ASM2976175v1_strain_ATCC43921/1-2945	250	676	677	833	250	251	298	918	306	0	912	240	0	226	226	177	349	234	250	243	222	252	254	303	249	249	245	0	209	222	351	245	299	302	249	247	250	217	113	244	298	226	350	403	223	258	253	209	254
Lgarviae_GCF_029911905.1_ASM2991190v1_strain_ZB-1/1-2945	194	480	477	717	194	193	232	752	240	209	745	204	209	190	190	199	275	228	192	226	186	214	216	237	193	193	219	209	0	188	277	219	233	234	191	189	192	216	212	186	232	205	276	364	203	220	215	0	216
Lgarviae_GCF_030210915.1_ASM3021091v1_strain_G-34/1-2945	237	658	658	802	237	238	284	905	291	222	896	230	222	14	14	218	329	237	241	245	10	238	240	288	236	236	229	222	188	0	331	229	285	289	238	236	239	227	222	233	284	218	330	377	215	242	237	188	238
Lgarviae_GCF_030210975.1_ASM3021097v1_strain_N201/1-2945	183	735	741	700	183	184	75	970	83	351	961	327	351	335	335	321	2	352	151	349	331	366	368	80	182	182	340	351	277	331	0	340	76	81	154	152	155	343	344	175	75	321	3	484	314	372	367	277	368
Lgarviae_GCF_030211055.1_ASM3021105v1_strain_G24/1-2945	237	692	686	831	237	238	285	929	295	245	923	229	245	231	231	226	338	257	237	260	227	239	241	292	236	236	0	245	219	229	340	0	286	291	236	234	237	242	247	231	285	224	339	400	217	249	244	219	245
Lgarviae_GCF_030211125.1_ASM3021112v1_strain_CAS_2/1-2945	113	700	701	736	113	114	1	933	155	299	924	273	299	287	287	267	74	300	79	295	283	314	316	152	112	112	286	299	233	285	76	286	0	153	82	80	83	285	290	107	1	265	75	446	258	322	317	233	318
Lgarviae_GCF_030211265.1_ASM3021126v1_strain_93/1-2945	114	694	699	751	114	115	152	938	10	302	929	282	302	293	293	276	79	309	80	300	289	319	321	7	113	113	291	302	234	289	81	291	153	0	83	81	84	302	297	106	152	276	80	448	269	325	320	234	321
Lgarviae_GCF_030211295.1_ASM3021129v1_strain_240_88/1-2945	39	662	662	792	39	40	81	902	85	249	893	227	249	242	242	219	152	254	9	247	238	266	268	82	38	38	236	249	191	238	154	236	82	83	0	4	7	243	246	35	81	217	153	407	212	274	269	191	270
Lgarviae_GCF_030211355.1_ASM3021135v1_strain_1108_2/1-2945	37	660	660	790	37	38	79	900	83	247	891	225	247	240	240	217	150	252	7	245	236	264	266	80	36	36	234	247	189	236	152	234	80	81	4	0	5	241	244	33	79	215	151	405	210	272	267	189	268
Lgarviae_GCF_030211455.1_ASM3021145v1_strain_170_03a/1-2945	40	663	663	793	40	41	82	903	86	250	894	228	250	243	243	220	153	255	10	248	239	267	269	83	39	39	237	250	192	239	155	237	83	84	7	5	0	244	247	36	82	218	154	408	213	275	270	192	271
Lgarviae_GCF_030211565.1_ASM3021156v1_strain_DICM09_00973-1/1-2945	244	684	683	827	244	245	284	930	306	217	921	246	217	229	229	214	341	245	244	242	225	247	249	303	243	243	242	217	216	227	343	242	285	302	243	241	244	0	222	240	284	230	342	403	229	255	250	216	251
Lgarviae_GCF_030211605.1_ASM3021160v1_strain_BA06_02552-1/1-2945	247	679	682	836	247	248	289	925	301	113	919	247	113	222	222	246	342	239	243	253	218	251	253	298	246	246	247	113	212	222	344	247	290	297	246	244	247	222	0	243	289	241	343	408	235	259	254	212	255
Lgarviae_GCF_030211615.1_ASM3021161v1_strain_BA06_02137_2/1-2945	32	657	656	799	32	33	106	897	108	244	888	220	244	235	235	214	173	251	36	242	231	261	263	105	31	31	231	244	186	233	175	231	107	106	35	33	36	240	243	0	106	212	174	400	205	269	264	186	265
Lgarviae_GCF_030219645.1_ASM3021964v1_strain_T1-1/1-2945	112	699	700	735	112	113	0	932	154	298	923	272	298	286	286	266	73	299	78	294	282	313	315	151	111	111	285	298	232	284	75	285	1	152	81	79	82	284	289	106	0	264	74	445	257	321	316	232	317
Lgarviae_GCF_030219685.1_ASM3021968v1_strain_MAM75/1-2945	218	673	676	816	218	219	264	920	278	226	912	55	226	216	216	200	319	234	218	253	212	248	250	275	217	217	224	226	205	218	321	224	265	276	217	215	218	230	241	212	264	0	320	395	35	254	249	205	250
Lgarviae_GCF_030219725.1_ASM3021972v1_strain_3AA7/1-2945	182	734	740	699	182	183	74	969	82	350	960	326	350	334	334	320	1	351	150	348	330	365	367	79	181	181	339	350	276	330	3	339	75	80	153	151	154	342	343	174	74	320	0	483	313	371	366	276	367
Lgarviae_GCF_031929565/1-2945	406	826	829	909	406	407	445	1053	450	403	1046	401	403	375	375	391	482	404	408	409	371	406	408	447	405	405	400	403	364	377	484	400	446	448	407	405	408	403	408	400	445	395	483	0	389	413	408	364	409
Lgarviae_GCF_900114555.1_strain_M79/1-2945	211	673	674	818	211	212	257	920	271	223	912	66	223	213	213	194	312	225	211	245	209	253	255	268	210	210	217	223	203	215	314	217	258	269	212	210	213	229	235	205	257	35	313	389	0	259	254	203	255
Lgarviae_NC_015930.1_strain_ATCC_49156/1-2945	275	691	693	828	275	276	321	924	329	258	919	260	258	244	244	237	370	278	275	267	240	54	56	326	274	274	249	258	220	242	372	249	322	325	274	272	275	255	259	269	321	254	371	413	259	0	9	220	10
Lgarviae_NC_017490.1_strain_Lg2/1-2945	270	686	688	823	270	271	316	919	324	253	914	255	253	239	239	232	365	273	270	262	235	47	49	321	269	269	244	253	215	237	367	244	317	320	269	267	270	250	254	264	316	249	366	408	254	9	0	215	1
Lgarviae_NZ_AP026069.1_strain_MS210922A/1-2945	194	480	477	717	194	193	232	752	240	209	745	204	209	190	190	199	275	228	192	226	186	214	216	237	193	193	219	209	0	188	277	219	233	234	191	189	192	216	212	186	232	205	276	364	203	220	215	0	216
Lgarviae_NZ_CP026502.1_strain_JJJN1/1-2945	271	687	689	824	271	272	317	920	325	254	915	256	254	240	240	233	366	274	271	263	236	48	50	322	270	270	245	254	216	238	368	245	318	321	270	268	271	251	255	265	317	250	367	409	255	10	1	216	0
Lgarviae_NZ_CP028386.1_strain_IBB3403/1-2945	182	734	740	699	182	183	74	969	82	350	960	326	350	334	334	320	1	351	150	348	330	365	367	79	181	181	339	350	276	330	3	339	75	80	153	151	154	342	343	174	74	320	0	483	313	371	366	276	367
Lgarviae_NZ_CP065637.1_strain_FDAARGOS_929/1-2945	250	676	677	833	250	251	298	918	306	0	912	240	0	226	226	177	349	234	250	243	222	252	254	303	249	249	245	0	209	222	351	245	299	302	249	247	250	217	113	244	298	226	350	403	223	258	253	209	254
Lgarviae_NZ_CP065691.1_strain_FDAARGOS_893/1-2945	890	1091	1101	1260	890	889	917	112	929	908	88	899	908	893	893	897	953	922	888	916	891	912	914	926	889	889	916	908	739	894	955	916	918	923	887	885	888	917	915	882	917	907	954	1040	907	915	910	739	911
Lgarviae_NZ_CP071285.1_strain_LG728/1-2945	43	662	662	792	43	44	79	904	83	251	895	227	251	244	244	221	150	256	1	245	240	268	270	80	42	42	238	251	193	242	152	238	80	81	10	8	11	245	244	37	79	219	151	409	212	276	271	193	272
Lgarviae_NZ_CP071290.1_strain_LG791/1-2945	275	691	693	828	275	276	321	924	331	260	919	258	260	244	244	239	372	278	275	269	240	52	54	328	274	274	249	260	220	244	374	249	322	327	274	272	275	255	259	269	321	252	373	411	257	28	21	220	22
Lgarviae_NZ_CP084377.1_strain_Lg-Granada/1-2945	41	660	660	790	41	42	77	902	81	249	893	225	249	242	242	219	148	254	3	243	238	266	268	78	40	40	236	249	191	240	150	236	78	79	8	6	9	243	242	35	77	217	149	407	210	274	269	191	270
Lgarviae_NZ_CP109635.1_strain_Alexii-11_2/1-2945	343	758	757	735	343	344	381	997	401	311	984	336	311	320	320	310	436	337	341	342	316	340	342	398	342	342	340	311	293	320	438	340	382	397	340	338	341	156	322	339	381	320	437	481	326	348	343	293	344
Lgarviae_NZ_CP109636.1_strain_Alexii-6_2/1-2945	343	758	757	735	343	344	381	997	401	311	984	336	311	320	320	310	436	337	341	342	316	340	342	398	342	342	340	311	293	320	438	340	382	397	340	338	341	156	322	339	381	320	437	481	326	348	343	293	344
Lgarviae_NZ_CP118627.1_strain_Pa-2/1-2945	243	662	662	806	243	244	288	906	297	228	898	230	228	2	2	224	335	237	245	247	6	240	242	294	242	242	233	228	192	16	337	233	289	295	244	242	245	231	224	237	288	218	336	377	215	246	241	192	242
Lgarviae_NZ_CP118950.1_strainDSM_20684/1-2945	250	676	677	833	250	251	298	918	306	0	912	240	0	226	226	177	349	234	250	243	222	252	254	303	249	249	245	0	209	222	351	245	299	302	249	247	250	217	113	244	298	226	350	403	223	258	253	209	254
LI296620A_23_sea_bass/1-2945	194	480	477	717	194	193	232	752	240	209	745	204	209	190	190	199	275	228	192	226	186	214	216	237	193	193	219	209	0	188	277	219	233	234	191	189	192	216	212	186	232	205	276	364	203	220	215	0	216
LI296620B_23_sea_bass/1-2945	194	480	477	717	194	193	232	752	240	209	745	204	209	190	190	199	275	228	192	226	186	214	216	237	193	193	219	209	0	188	277	219	233	234	191	189	192	216	212	186	232	205	276	364	203	220	215	0	216
LI329384_23_sea_bass/1-2945	194	480	477	717	194	193	232	752	240	209	745	204	209	190	190	199	275	228	192	226	186	214	216	237	193	193	219	209	0	188	277	219	233	234	191	189	192	216	212	186	232	205	276	364	203	220	215	0	216
NO317338_20_rainbow_trout/1-2945	3	666	665	809	3	4	113	906	117	251	897	229	251	242	242	221	182	256	43	249	238	268	270	114	2	2	238	251	195	238	184	238	114	115	40	38	41	245	248	33	113	219	183	407	212	276	271	195	272
NO346039_22_rainbow_trout/1-2945	3	666	665	809	3	4	113	906	117	251	897	229	251	242	242	221	182	256	43	249	238	268	270	114	2	2	238	251	195	238	184	238	114	115	40	38	41	245	248	33	113	219	183	407	212	276	271	195	272
NO358429_21_rainbow_trout/1-2945	3	666	665	809	3	4	113	906	117	251	897	229	251	242	242	221	182	256	43	249	238	268	270	114	2	2	238	251	195	238	184	238	114	115	40	38	41	245	248	33	113	219	183	407	212	276	271	195	272
PV358422_21_rainbow_trout/1-2945	3	666	665	809	3	4	113	906	117	251	897	229	251	242	242	221	182	256	43	249	238	268	270	114	2	2	238	251	195	238	184	238	114	115	40	38	41	245	248	33	113	219	183	407	212	276	271	195	272
SO223838_20_rainbow_trout/1-2945	3	666	665	809	3	4	113	906	117	251	897	229	251	242	242	221	182	256	43	249	238	268	270	114	2	2	238	251	195	238	184	238	114	115	40	38	41	245	248	33	113	219	183	407	212	276	271	195	272
TV252859_20_rainbow_trout/1-2945	4	667	666	810	4	5	114	907	118	252	898	230	252	243	243	222	183	257	44	250	239	269	271	115	3	3	239	252	196	239	185	239	115	116	41	39	42	246	249	34	114	220	184	408	213	277	272	196	273
VR143326_21_rainbow_trout/1-2945	4	667	666	810	4	5	114	907	118	252	898	230	252	243	243	222	183	257	44	250	239	269	271	115	3	3	239	252	196	239	185	239	115	116	41	39	42	246	249	34	114	220	184	408	213	277	272	196	273
min: 0 max: 1266
[truncated: 20 more columns]
